# Supplementary material
Source: PubMed Central journal article supplement (PMC3557778)
Supplement: supp_dev.088534_DEV088534.pdf [file supp_dev.088534_DEV088534.pdf]

D.m. RFRGKQEKIGSLSCGVPGFKIKHPGFPVTQSQ-----VDHVLVRNLHPSEAPSPVVGAGDHMRPPVGSHELLVCPPELLTKK 75  
 T.c. RLRKQHKKEKGGAPGSPSGLHSHKQNGSATMMSTNGLNAVNDNILGRSLHSGDNSLGYHSENGDVIRGIGGHSVLCPELLSKK 81  
 A.m. RLRRQNKEKSAPSVVNKNTNAIMTGNPLVGTG-----NDNLMSRHEN-----TYISDTSDLR-GVG---HMGPELLISKK 65  
 H.s. CNQCRGKKAKNPKEEKKPKEKKKKKGSENVAFD-----DPDNIP-----PYCDDMTVRK 48  
 M.m. CNQCRGKMPKNPKEEKKPKEKKKKKGSENVAFD-----DPDNIP-----PYGDDLAVRK 48  
 G.g. CNQCRGKKSAPKQEKKTKEKKKKKGSENVAFD-----DPDNIP-----PYGDDMTVRK 48

**A** **B**

D.m. FKEPTAEMPQPQQQQQRPQRPDI IERESP---LIREDHHLPI PPLHPLPLEHASSVDMGSEYPEHYDLENASSIAPSDIDI 153  
 T.c. YKE--RDIIQG--ELTRPQRPDI IEREVSKNLPMREEHHPPLPPTSNNHHDHGG-NDLNSEIPEHYDLENASSIAPSDIDI 157  
 A.m. YKE--REINAS--TEHRPQRPDI IEREVTKSPPIRDEHPPPLPPAQTSLHTHEH--NPEPDMPEHYDLENASSIAPSDIDI 140  
 H.s. QPE-----GNPKPDI IERENP--YLIYDETDIPHNS ETIPSAPLAS---PEQEI EHYDIDNASSIAPSDADI 110  
 M.m. QPE-----GNPKPDI IERENP--YLIFDETDIPHNS ETIPSAPLAS---PEQEI EHYDIDNASSIAPSDADI 110  
 G.g. QPE-----GNPKPDI IERENP--YLIYDETDIPHAT ETIPSAPLAS---PEPEI EHYDIDNASSIAPSDADI 110

**ml**

D.m. VYHYKGYREAAGLRKYKASVPPVSAYTHHKHQNSGSQQQQQHRHTAPFVTRNQQG-QPPPPPTSASRTHQSTPLARLSPS 233  
 T.c. VYHYKGYREAGGVRKYKATPPPVAGY--HHKHASG--AQGQAQRHSPPHPTGYPP--RAPPVTPSGSRPHQSTPLARLSPS 233  
 A.m. VYHYKGYRD--GMRKYKATPPPINNYANHHKHTG-----QQRHTGFPFPPRALPPNVNQP PGPTQKLLQSTPLARLSPS 213  
 H.s. IQHYKQFRS--HTPKFSIQRHSPLGFARQSPMPLG---ASSLTYQP-SYGQGLRTSSLSHSACPTPNPLSRHSPAPFSKS 184  
 M.m. IQHYKQFRS--HTPKFSIQRHSPLGFARQSPMPLG---ASSLTYQPSSYGQGLRTSSLSHSACPTPNPLSRHSPAPFSKP 185  
 G.g. IQHYKQFRS--HTPKFSIQRHSPLGFARQSPMPLG---ASSLTYQP-SYGQGLRTSSLSHSACPTPNPLSRHSPAPFSKS 184

**P32**

D.m. SELSSQQPRILTLHDISGKPLQSALLATTSSSGGVGKDV-HSNSERSLNSPVMSQLSGQSSSASRQKPGVPQQQ--AQQTS 311  
 T.c. SEMSAQQPRILTLHDISGKPLQSALLATTSSSGGVGKDVLHSNSERSLNSPVMSQLSGQSSS--RKAAPPP-----VT 306  
 A.m. SELSAQQPRILTLHDISGKPLQSALLATTSSSGGVGKDALNSNSERSLNSPIMSQSLSGSTASRKAPQSNNSVNNVSSGP 294  
 H.s. STFYRNSP----ARELHLPIRDGNTLEMHGDTCPGIFNYATRLGRRSKSPQAMASHGSRPGSRKQPIGQI PLE--SSPP 259  
 M.m. SAFYRNSP----ARELHLP LRDGGTLEMHGDPQPGMFNYATRLGRRSKSPQAMASHGSRPGSRKQPIA QI PLE--SSPP 260  
 G.g. STFYRHS P----ARELHLSIREGSPLEMHN DVCQPGIFNYATRLGRRSKSPQTMASHGSRPGSRKQPIGQI PLE--TAPP 259

**C** **mlV** **D** **mlV**

D.m. MGLTAEIERLNG-RPRTC SLI STLDVSSSSSEAPR--VSSSALHMSLG-----GDVDAHSSTSTDES GNSD SFTCS EIEYD 384  
 T.c. NSLTAEIERLNS-RPRTSSLVSTLDVSSSSSEAPRGGVNNHLNHLHHS P----VPETHHSSTTTDES GNSD SFTCS EIEYD 382  
 A.m. IGLTAEIERLNS-RPRTSSLVSTLDVSSSSSEARGP-PAHGPLHLHRRHTPPVERLERRNSSTTDES GNSD SFTCS --EYD 371  
 H.s. VGLSIEEVERLNTPRPRNPSIC S ADHGRSSSEEDCRR-----PLSRTRNP----ADGIPAPESSSDSDS HESFTCS EMEYD 331  
 M.m. VGLSIEEVERLNTPRPRNPSIC S ADHGRSSSEEDCRR-----PLSRTRNP----ADGIPAPESSSDSDS HESFTCS EMEYD 332  
 G.g. VGLSIEEVERLNTPRPRNPSIC S ADHGRSSSEEDCRR-----PLSRTRNP----ADGIPAPESSSDSDS HESFTCS EMEYD 331

D.m. NNSLSGDGKYSTSKSLLDGRSPVSRALSGGETSRNPPTTVVKTPPIPP-HAYDGFESSFRGSLSTLVASDDDI ANHLSGIY 464  
 T.c. NASLAGD-KYKSNE-----PDSRRNDSSSGNKN-----NLPLP---SYDGFDS SYR GSMSTLVASDDELEG---PMY 442  
 A.m. NTSLVGD-KRSDN-----PFAKQDDEEVNQRNNE SAQTTKPPLPPNVNYDGFDS SFRGSLSTLVASDDDLSTHMGGLY 443  
 H.s. REKPMVYTSRMPK-----LSQVNESDADDEDN-----YGARLKP-RRYHGRRRAEG-GPVG TQAAAPGTADNTLPMKL 396  
 M.m. REKPVVYTSRMPK-----LSQVNESDADDEDN-----YGARLKP-RRYHGRRRAEG-GPVG TPAASGAADSTL--KL 395  
 G.g. RDKPIAYTSRMPK-----LSQVNESDADDEDN-----YGVRLKP-RRYPCRRREG-GPVG--AQAGTGESSLPVKL 394

**E** **F**

D.m. RKANGAA-SPSATTLGWEYLLNWGPSYENLMGVFKDIAELPDTNGPSQQQQQQQTQVSTLRMPSSNGPAAPEEYV 538  
 T.c. RPSTG---SPSTTGLGWDYLLNWGNFESLAGVFKDIAELPDS-----VNGRVPSSLRLT--NAPKPSEEYV 504  
 A.m. RPNNSGSPSTTTTALSWDYLLNWGLNFDLSLGVFIDIAELPDS-----ANRVPSTLRLP-ANIPKPSEEYV 508  
 H.s. GQQAG-----TFNWDNLLNWGPGFGHYVDVFKDLASLPEK-----AAANEEGKAGTTKP-VPKDGEAEQYV 456  
 M.m. GQQAG-----NFNWDNLLNWGPGFGHYVDVFKDLASLPEK-----AAGNEEGKGA AKP-AAKDGEAEQYV 455  
 G.g. GQQAG-----SFNWDNLLNWGPGFGHYVDVFKDLASLPEKTTAAAAAASEDNKSGTTKP-VSKEGEAEQYV 460

**Fig. S1. Alignment of Fat ICD sequences.** ClustalW alignment of intracellular domains (generated at the NCBI web site) of three insect Fat sequences (D.m., *Drosophila melanogaster*; T.c., *Tribolium castaneum*; A.m., *Apis mellifera*) and three vertebrate Fat4 sequences (H.s., *Homo sapiens*; M.m., *Mus musculus*; G.g., *Gallus gallus*). Based on transmembrane domain predictions, the ICD in *D. melanogaster* Fat is 538 amino acids, and begins at amino acid 4610. Sequence identity is indicated by relative shading. Conserved motifs deleted by mutations are indicated by red lines and regions affected by point mutations are indicated by green lines; the specific Ser and Thr residues changed in these point mutations are indicated in Fig. S5.

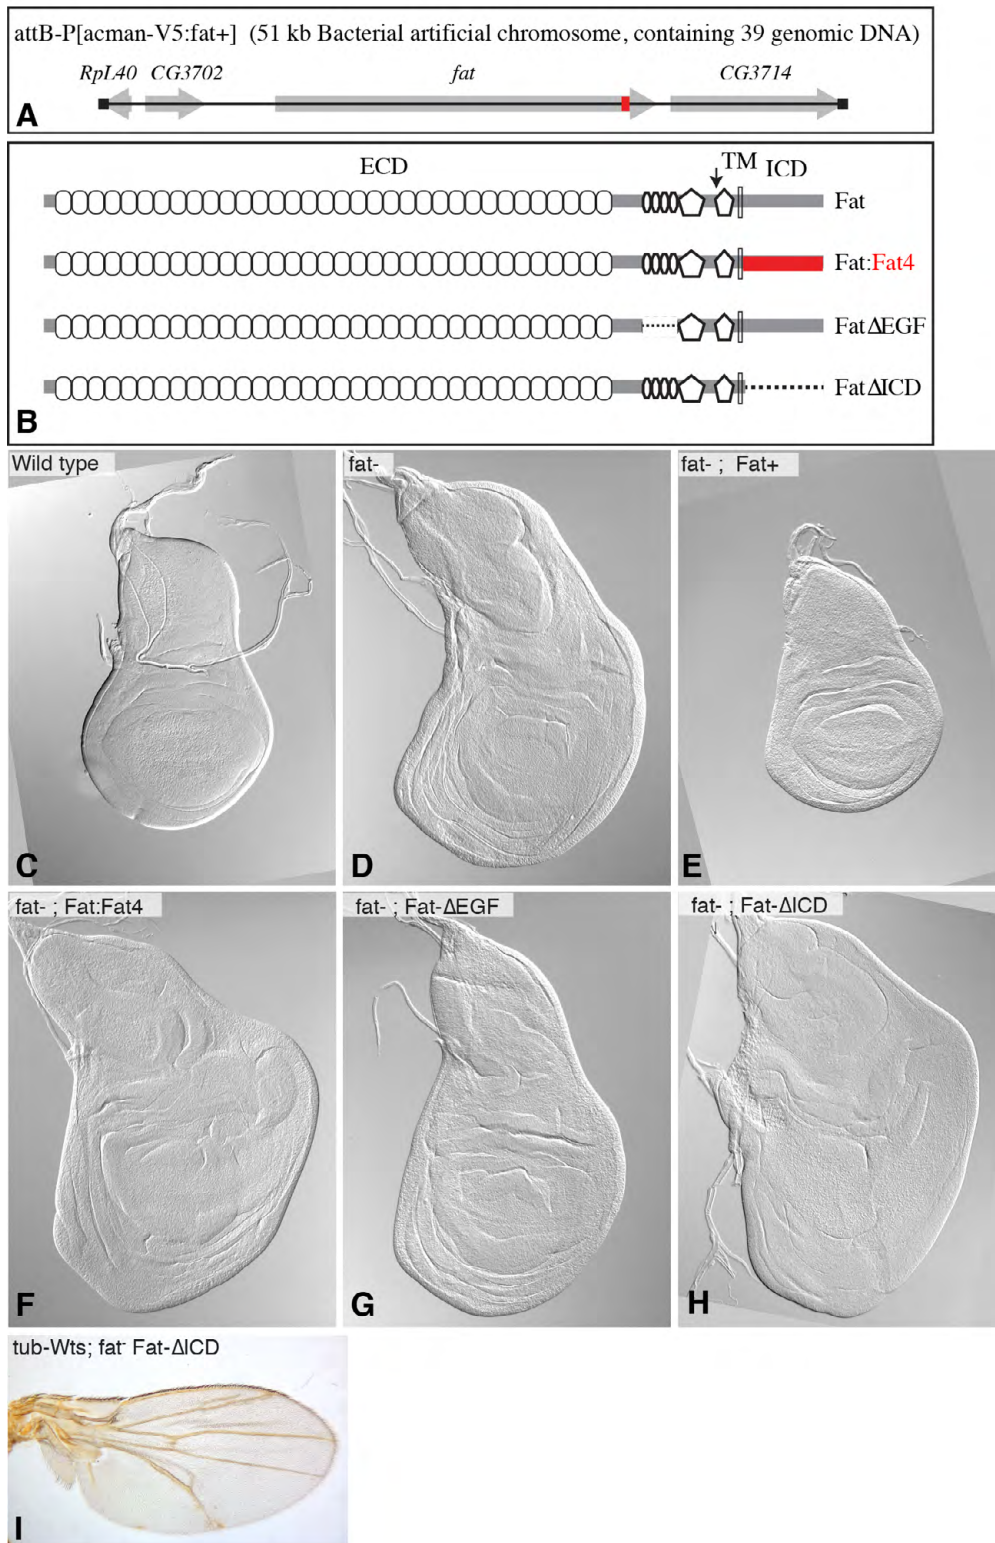

**Fig. S2. Additional analysis of Fat constructs that fail to rescue *fat* mutant lethality.** (A) The *fat* locus genomic rescue construct, with the region encoding the ICD highlighted in red. (B) Wild-type (top) and three mutant forms of Fat examined; red indicates replacement of the *Drosophila* ICD by the human FAT4 ICD. (C-H) Examples of wing discs from representative late third instar larvae of the indicated genotypes. Lack of Fat activity results in overgrown wing discs and increased folding in the proximal wing. (I) Adult wing from *fat*<sup>8</sup>/*fat*<sup>G-ry</sup> expressing *tub-Gal4 UAS-wts* and *P[acman] V5:fat $\Delta$ ICD[68A4]*.

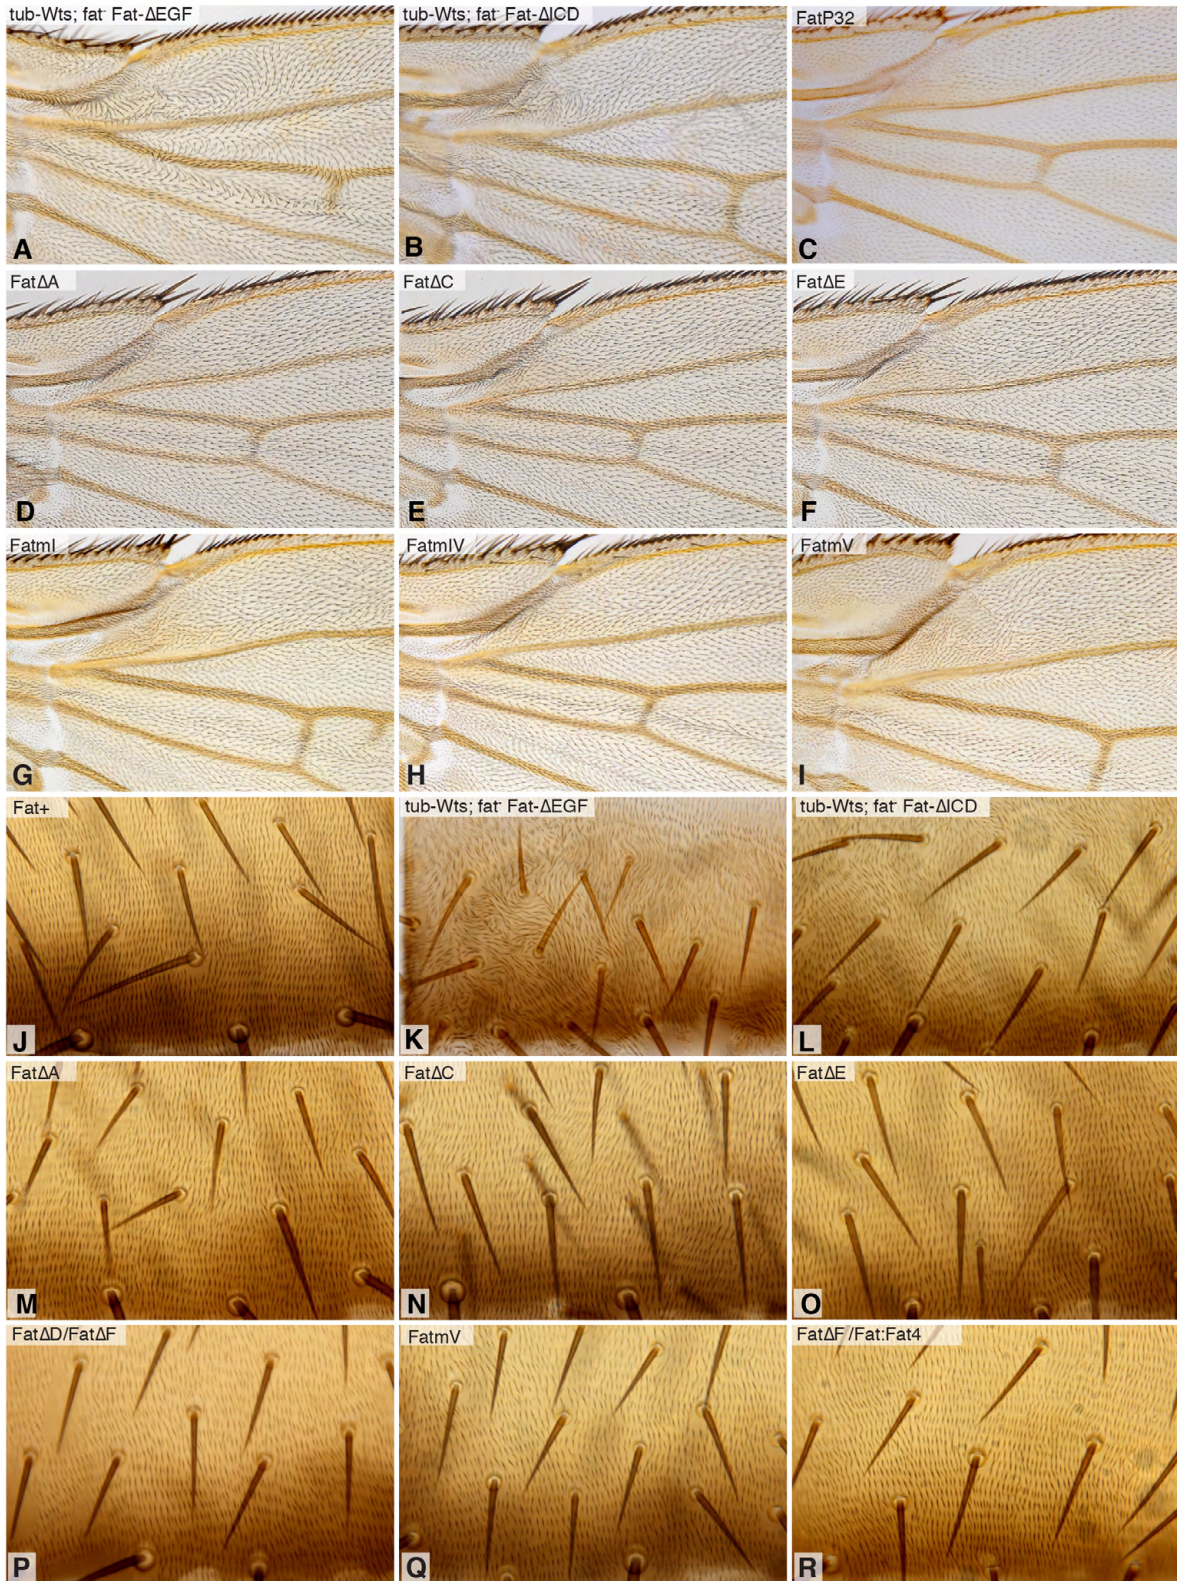

**Fig. S3. Additional analysis of hair polarity phenotypes associated with Fat ICD motif mutations.** (A-I) Proximal anterior wings from *fat<sup>8</sup>/fat<sup>G-rv</sup>* expressing (A) *tub-Gal4 UAS-wts P[acman]V5:fatΔEGF[68A4]*, (B) *tub-Gal4 UAS-wts P[acman]V5:fatΔICD[68A4]*, (C) *P[acman]V5:fatP32[68A4]*, (D) *P[acman]V5:fatΔA[68A4]*, (E) *P[acman]V5:fatΔC[68A4]*, (F) *P[acman]V5:fatΔE[68A4]*, (G) *P[acman]V5:fat-mI[68A4]*, (H) *P[acman]V5:fat-mIV[68A4]*, (I) *P[acman]V5:fat-mV[68A4]*. (J-R) Abdomens from *fat<sup>8</sup>/fat<sup>G-rv</sup>* expressing (J) *P[acman]V5:fat[68A4]*, (K) *tub-Gal4 UAS-wts P[acman]V5:fatΔEGF[68A4]*, (L) *tub-Gal4 UAS-wts P[acman]V5:fatΔICD[68A4]*, (M) *P[acman]V5:fatΔA[68A4]*, (N) *P[acman]V5:fatΔC[68A4]*, (O) *P[acman]V5:fatΔE[68A4]*, (P) *P[acman]V5:fatΔD[68A4]/P[acman]V5:fatΔF[68A4]*, (Q) *P[acman]V5:fat-mV[68A4]*, (R) *P[acman]V5:fatΔF[68A4]/P[acman]V5:fat:Fat4[68A4]*.

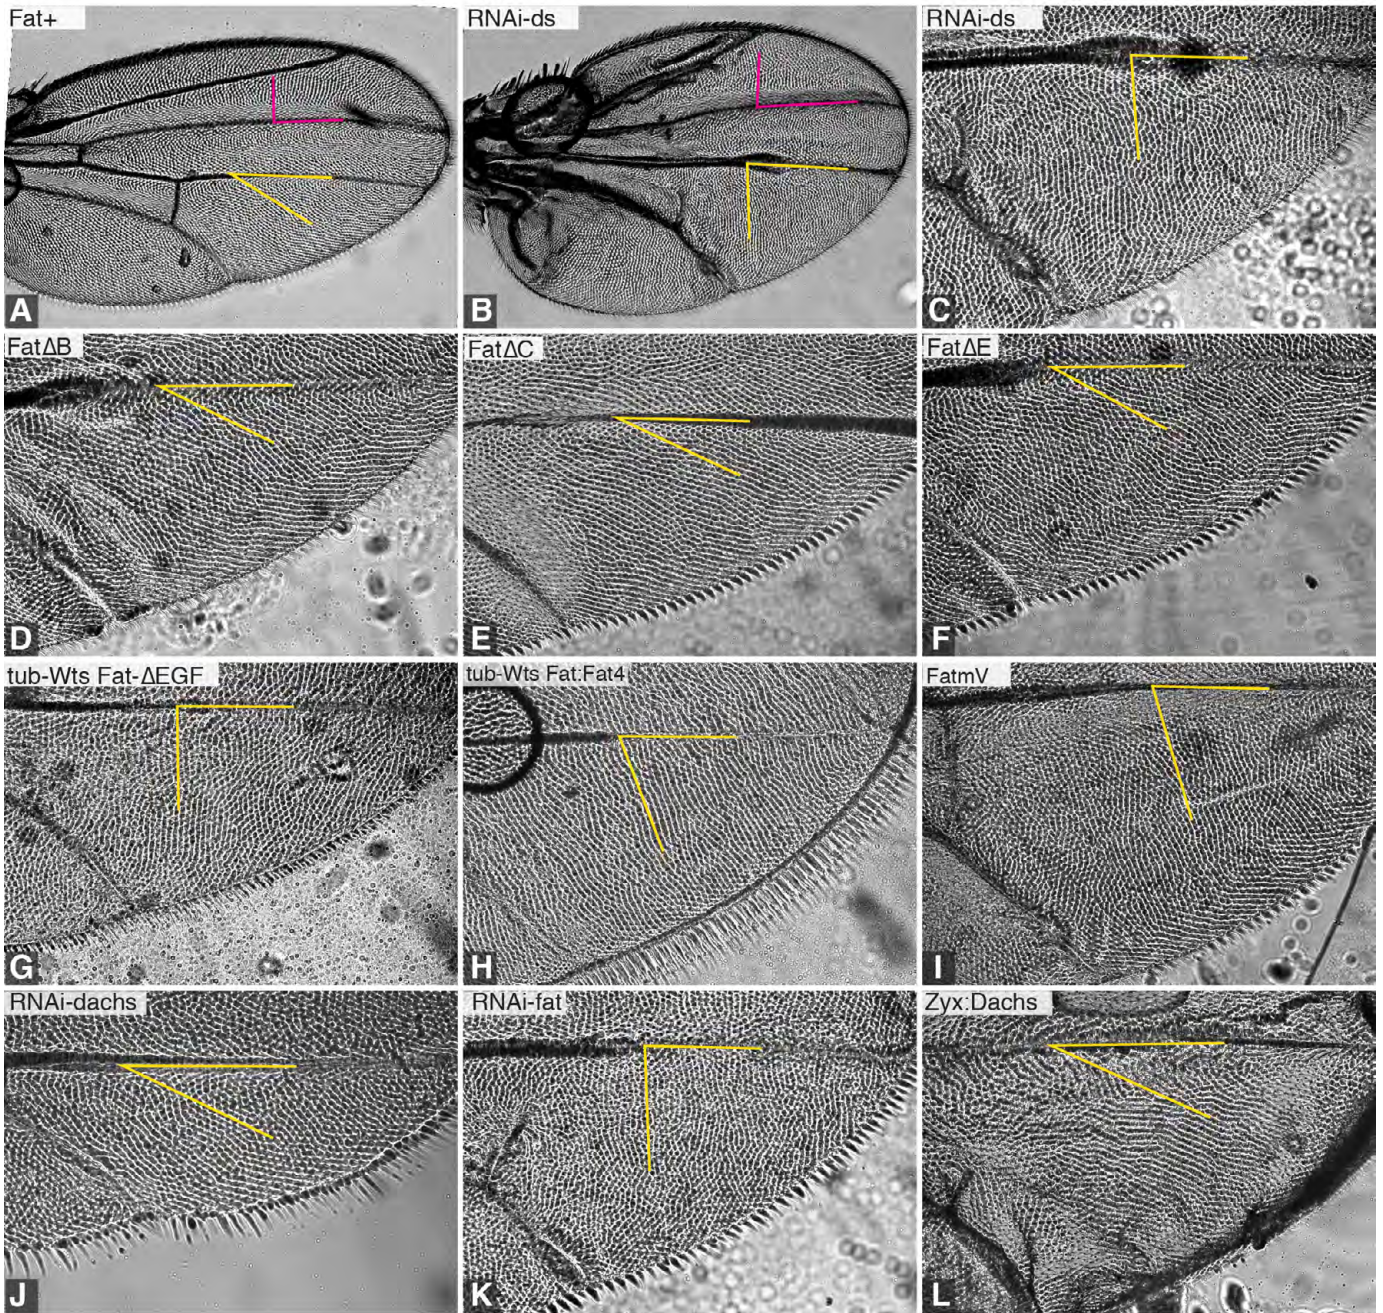

**Fig. S4. Additional analysis of ridge polarity.** Proximal anterior wings, visualized by cuticle refraction microscopy (Doyle et al., 2008), from *fat<sup>s</sup>/fat<sup>G-rv</sup>* expressing (A) *P[acman]V5:fat[68A4]*, (D) *P[acman]V5:fatΔB[68A4]*, (E) *P[acman]V5:fatΔC[68A4]*, (F) *P[acman]V5:fatΔE[68A4]*, (G) *tub-Gal4 UAS-wts P[acman]V5:fatΔEGF[68A4]*, (H) *tub-Gal4 UAS-wts P[acman]V5:fat:Fat4[68A4]*, (I) *P[acman]V5:fat-mV[68A4]*, or from *fat<sup>+</sup>* flies expressing *nub-Gal4* and (B,C) *UAS-RNAi-ds*, (J) *UAS-RNAi-dachs*, (K) *UAS-RNAi-fat*, (L) *UAS-Zyx:dachs*.

| Location in Fat intracellular domain (538 aa) |                                                                                                                                                                                                                                                                                                                                                                                                                                                                                                                                                                                                                                                                                            |
|-----------------------------------------------|--------------------------------------------------------------------------------------------------------------------------------------------------------------------------------------------------------------------------------------------------------------------------------------------------------------------------------------------------------------------------------------------------------------------------------------------------------------------------------------------------------------------------------------------------------------------------------------------------------------------------------------------------------------------------------------------|
| Point mutants                                 | S 172<br>S 177<br>Y 179<br>T 180<br>S 187<br>S 189<br>T 199<br>T 204<br>T 216<br>S 217<br>S 219<br>T 221<br>S 224<br>T 225<br>S 231<br>S 233<br>S 234<br>S 237<br>S 238<br>T 261<br>T 262<br>S 263<br>S 264<br>S 265<br>S 274<br>S 276<br>S 279<br>S 282<br>S 286<br>S 289<br>S 292<br>S 293<br>S 294<br>S 296<br>T 310<br>S 311<br>T 315<br>S 330<br>S 333<br>T 334<br>S 339<br>S 340<br>S 341<br>S 342<br>S 348<br>S 349<br>S 350<br>S 355<br>S 364<br>S 365<br>T 366<br>S 367<br>T 368<br>S 371<br>S 375<br>T 377<br>S 379<br>Y 383<br>S 387<br>S 389<br>S 395<br>T 396<br>S 397<br>S 399<br>S 405<br>S 408<br>S 412                                                                    |
| P1                                            |                                                                                                                                                                                                                                                                                                                                                                                                                                                                                                                                                                                                                                                                                            |
| P2                                            |                                                                                                                                                                                                                                                                                                                                                                                                                                                                                                                                                                                                                                                                                            |
| P3                                            |                                                                                                                                                                                                                                                                                                                                                                                                                                                                                                                                                                                                                                                                                            |
| P4                                            |                                                                                                                                                                                                                                                                                                                                                                                                                                                                                                                                                                                                                                                                                            |
| P5                                            |                                                                                                                                                                                                                                                                                                                                                                                                                                                                                                                                                                                                                                                                                            |
| P6                                            |                                                                                                                                                                                                                                                                                                                                                                                                                                                                                                                                                                                                                                                                                            |
| P7                                            |                                                                                                                                                                                                                                                                                                                                                                                                                                                                                                                                                                                                                                                                                            |
| P8                                            |                                                                                                                                                                                                                                                                                                                                                                                                                                                                                                                                                                                                                                                                                            |
| P9                                            | A A A A                                                                                                                                                                                                                                                                                                                                                                                                                                                                                                                                                                                                                                                                                    |
| P10                                           |                                                                                                                                                                                                                                                                                                                                                                                                                                                                                                                                                                                                                                                                                            |
| P11                                           |                                                                                                                                                                                                                                                                                                                                                                                                                                                                                                                                                                                                                                                                                            |
| P12                                           |                                                                                                                                                                                                                                                                                                                                                                                                                                                                                                                                                                                                                                                                                            |
| P13                                           |                                                                                                                                                                                                                                                                                                                                                                                                                                                                                                                                                                                                                                                                                            |
| P14                                           |                                                                                                                                                                                                                                                                                                                                                                                                                                                                                                                                                                                                                                                                                            |
| P15                                           |                                                                                                                                                                                                                                                                                                                                                                                                                                                                                                                                                                                                                                                                                            |
| P16                                           |                                                                                                                                                                                                                                                                                                                                                                                                                                                                                                                                                                                                                                                                                            |
| P17                                           |                                                                                                                                                                                                                                                                                                                                                                                                                                                                                                                                                                                                                                                                                            |
| P18                                           |                                                                                                                                                                                                                                                                                                                                                                                                                                                                                                                                                                                                                                                                                            |
| P19                                           |                                                                                                                                                                                                                                                                                                                                                                                                                                                                                                                                                                                                                                                                                            |
| P20                                           |                                                                                                                                                                                                                                                                                                                                                                                                                                                                                                                                                                                                                                                                                            |
| P14D                                          |                                                                                                                                                                                                                                                                                                                                                                                                                                                                                                                                                                                                                                                                                            |
| P15D                                          |                                                                                                                                                                                                                                                                                                                                                                                                                                                                                                                                                                                                                                                                                            |
| P21                                           |                                                                                                                                                                                                                                                                                                                                                                                                                                                                                                                                                                                                                                                                                            |
| P22                                           |                                                                                                                                                                                                                                                                                                                                                                                                                                                                                                                                                                                                                                                                                            |
| P23                                           |                                                                                                                                                                                                                                                                                                                                                                                                                                                                                                                                                                                                                                                                                            |
| P24                                           |                                                                                                                                                                                                                                                                                                                                                                                                                                                                                                                                                                                                                                                                                            |
| P25                                           |                                                                                                                                                                                                                                                                                                                                                                                                                                                                                                                                                                                                                                                                                            |
| P26                                           |                                                                                                                                                                                                                                                                                                                                                                                                                                                                                                                                                                                                                                                                                            |
| P27                                           |                                                                                                                                                                                                                                                                                                                                                                                                                                                                                                                                                                                                                                                                                            |
| P28                                           |                                                                                                                                                                                                                                                                                                                                                                                                                                                                                                                                                                                                                                                                                            |
| P29                                           |                                                                                                                                                                                                                                                                                                                                                                                                                                                                                                                                                                                                                                                                                            |
| P30                                           |                                                                                                                                                                                                                                                                                                                                                                                                                                                                                                                                                                                                                                                                                            |
| P31                                           |                                                                                                                                                                                                                                                                                                                                                                                                                                                                                                                                                                                                                                                                                            |
| P25D                                          |                                                                                                                                                                                                                                                                                                                                                                                                                                                                                                                                                                                                                                                                                            |
| P26D                                          |                                                                                                                                                                                                                                                                                                                                                                                                                                                                                                                                                                                                                                                                                            |
| P27D                                          |                                                                                                                                                                                                                                                                                                                                                                                                                                                                                                                                                                                                                                                                                            |
| P32                                           |                                                                                                                                                                                                                                                                                                                                                                                                                                                                                                                                                                                                                                                                                            |
| P32D                                          |                                                                                                                                                                                                                                                                                                                                                                                                                                                                                                                                                                                                                                                                                            |
| P33                                           |                                                                                                                                                                                                                                                                                                                                                                                                                                                                                                                                                                                                                                                                                            |
| P33D                                          |                                                                                                                                                                                                                                                                                                                                                                                                                                                                                                                                                                                                                                                                                            |
| m I                                           |                                                                                                                                                                                                                                                                                                                                                                                                                                                                                                                                                                                                                                                                                            |
| m IV                                          |                                                                                                                                                                                                                                                                                                                                                                                                                                                                                                                                                                                                                                                                                            |
| m V                                           |                                                                                                                                                                                                                                                                                                                                                                                                                                                                                                                                                                                                                                                                                            |
|                                               | S 4781<br>S 4786<br>Y 4788<br>T 4789<br>S 4796<br>S 4798<br>T 4808<br>T 4813<br>T 4825<br>S 4826<br>S 4828<br>T 4830<br>S 4833<br>T 4834<br>S 4840<br>S 4842<br>S 4843<br>S 4846<br>S 4847<br>T 4870<br>T 4871<br>S 4872<br>S 4873<br>S 4874<br>S 4883<br>S 4885<br>S 4888<br>S 4891<br>S 4895<br>S 4898<br>S 4901<br>S 4902<br>S 4903<br>S 4905<br>T 4919<br>S 4920<br>T 4924<br>S 4939<br>S 4942<br>T 4943<br>S 4948<br>S 4949<br>S 4950<br>S 4951<br>S 4957<br>S 4958<br>S 4959<br>S 4964<br>S 4973<br>S 4974<br>T 4975<br>S 4976<br>T 4977<br>S 4980<br>S 4984<br>T 4986<br>S 4988<br>Y 4992<br>S 4996<br>S 4998<br>S 5004<br>T 5005<br>S 5006<br>S 5008<br>S 5014<br>S 5017<br>S 5021 |
| Location in whole Fat protein (5147aa)        |                                                                                                                                                                                                                                                                                                                                                                                                                                                                                                                                                                                                                                                                                            |

**Fig. S5. Potential phosphorylation sites altered in point mutant constructs.** Potential phosphorylation sites (Ser, Thr or Tyr) within the Fat intracellular domain were mutated to Ala or Asp, as indicated, within a series of constructs, which were then analyzed for effects on Fat mobility or activity. The first column indicates the name of the construct, top row shows the location of the site within the intracellular domain, bottom row shows location within the entire Fat coding sequence. Middle rows show amino acid mutations within each construct.

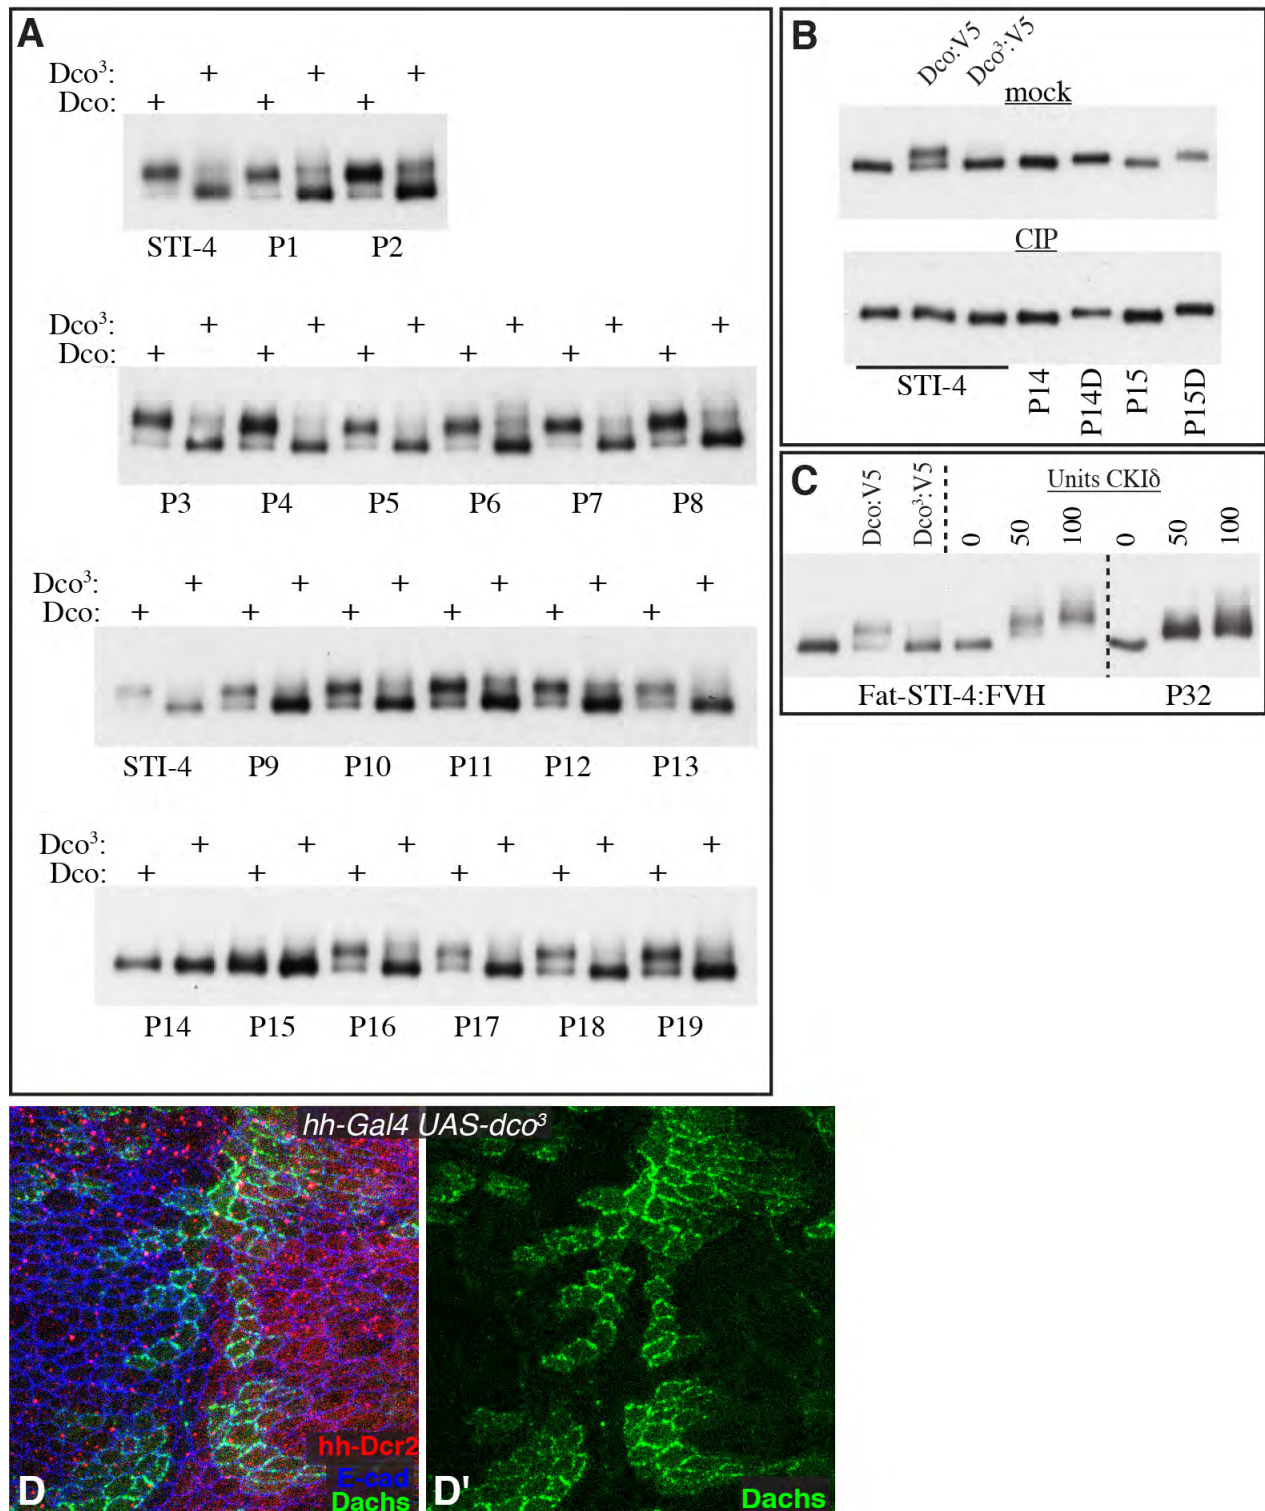

**Fig. S6. Additional analysis of Fat ICD phosphorylation.** (A) Western blots on S2 cell lysates expressing Fat-STI-4:FVH (STI-4) and point mutant derivatives, together with Dco or Dco<sup>3</sup>, as indicated. The amino acids mutated in each construct are indicated in Fig. S5. Of the mutants shown here, only P14 and P15 fail to exhibit the Dco-mediated mobility shift. (B) The mobility shift induced by Ser to Asp mutations is not reversed by phosphatase treatment (CIP). (C) Western blot of products of a kinase assay with vertebrate CKIδ shows that purified Fat-STI-4:FVH can be directly phosphorylated by CKI *in vitro*, with the extent of phosphorylation proportional to the amount of enzyme; for comparison, protein phosphorylated *in vivo* was run on the same gel. The S-to-A triple mutant Fat-STI-4-P32:FVH is still a substrate for CKIδ, but the degree of phosphorylation, as assayed by mobility shift, is reduced. (D,D') Overexpression of *dco<sup>3</sup>* in posterior cells, under *hh-Gal4* control (red), does not affect Dachs: Cit staining (green); Dachs: Cit in anterior cells serves as an internal control. Overexpression of Dco<sup>3</sup> mimics *dco<sup>3</sup>* mutation (Feng and Irvine, 2009); this confirms earlier studies of the lack of effect of *dco<sup>3</sup>* mutant clones on Dachs localization (Feng and Irvine, 2009).

**Table S1. Wing measurement statistics**

| Rescue constructs       | Normalized mean wing area | Standard deviation | Number measured | Standard error of the mean | <i>P</i> -value for <i>t</i> -test to Fat <sup>+</sup> |
|-------------------------|---------------------------|--------------------|-----------------|----------------------------|--------------------------------------------------------|
| Fat <sup>+</sup>        | 1.00                      | 0.030              | 29              | 0.006                      |                                                        |
| FatΔA                   | 0.96                      | 0.034              | 19              | 0.008                      | 1.03E-04                                               |
| FatΔB                   | 1.05                      | 0.043              | 16              | 0.011                      | 1.65E-04                                               |
| FatΔC                   | 0.98                      | 0.044              | 29              | 0.008                      | 4.52E-02                                               |
| FatΔD                   | 1.29                      | 0.051              | 34              | 0.009                      | 1.23E-33                                               |
| FatΔE                   | 1.08                      | 0.043              | 37              | 0.007                      | 3.34E-13                                               |
| FatΔF                   | 1.04                      | 0.057              | 32              | 0.010                      | 2.89E-04                                               |
| FatΔF/FatΔD             | 1.07                      | 0.037              | 12              | 0.011                      | 1.12E-05                                               |
| FatΔD/FatΔD             | 1.17                      | 0.042              | 15              | 0.011                      | 3.15E-12                                               |
| FatΔF/FatΔF             | 0.96                      | 0.068              | 16              | 0.017                      | 2.46E-02                                               |
| Fat <sup>+</sup> /FatΔD | 0.96                      | 0.027              | 10              | 0.009                      | 9.53E-04                                               |
| Fat <sup>+</sup> /FatΔF | 0.94                      | 0.019              | 10              | 0.006                      | 1.99E-08                                               |
| FatΔD/FAT4              | 1.33                      | 0.029              | 8               | 0.010                      | 6.55E-12                                               |
| FatΔF/FAT4              | 1.22                      | 0.040              | 12              | 0.012                      | 1.02E-11                                               |
| Fat <sup>+</sup> /FAT4  | 0.99                      | 0.028              | 12              | 0.008                      | 2.56E-01                                               |
| FatP32/                 | 1.05                      | 0.029              | 23              | 0.006                      | 4.63E-07                                               |
| FatmI/                  | 1.18                      | 0.036              | 16              | 0.009                      | 8.49E-16                                               |
| FatmIV/                 | 1.08                      | 0.014              | 12              | 0.004                      | 5.14E-14                                               |
| FatmV/                  | 1.35                      | 0.047              | 28              | 0.009                      | 1.79E-33                                               |
| FatmV/FatΔD             | 1.30                      | 0.034              | 11              | 0.010                      | 1.46E-14                                               |
| FatΔF/FatmV             | 1.12                      | 0.028              | 12              | 0.008                      | 3.73E-11                                               |

| Rescue constructs       | Normalized cross-vein distance | Standard deviation | Number measured | Standard error of the mean | <i>P</i> -value for <i>t</i> -test to Fat <sup>+</sup> |
|-------------------------|--------------------------------|--------------------|-----------------|----------------------------|--------------------------------------------------------|
| Fat <sup>+</sup>        | 1.00                           | 0.039              | 19              | 0.009                      |                                                        |
| FatΔA                   | 1.00                           | 0.027              | 18              | 0.006                      | 6.53E-01                                               |
| FatΔB                   | 0.97                           | 0.039              | 16              | 0.010                      | 1.27E-02                                               |
| FatΔC                   | 1.04                           | 0.038              | 29              | 0.007                      | 2.07E-04                                               |
| FatΔD                   | 0.73                           | 0.046              | 30              | 0.008                      | 1.41E-31                                               |
| FatΔE                   | 0.87                           | 0.037              | 31              | 0.007                      | 3.17E-20                                               |
| FatΔF                   | 0.27                           | 0.055              | 28              | 0.010                      | 6.78E-45                                               |
| FatΔF/FatΔD             | 0.62                           | 0.055              | 11              | 0.016                      | 1.28E-11                                               |
| FatΔD/FatΔD             | 0.64                           | 0.053              | 14              | 0.014                      | 4.21E-15                                               |
| FatΔF/FatΔF             | 0.28                           | 0.048              | 16              | 0.012                      | 2.92E-26                                               |
| Fat <sup>+</sup> /FatΔD | 0.94                           | 0.036              | 10              | 0.011                      | 4.91E-04                                               |
| Fat <sup>+</sup> /FatΔF | 0.92                           | 0.037              | 10              | 0.012                      | 1.75E-05                                               |
| FatΔD/FAT4              | 0.77                           | 0.044              | 6               | 0.018                      | 1.26E-05                                               |
| FatΔF/FAT4              | 0.66                           | 0.043              | 7               | 0.016                      | 5.04E-08                                               |

|                        |      |       |    |       |          |
|------------------------|------|-------|----|-------|----------|
| Fat <sup>+</sup> /FAT4 | 1.03 | 0.033 | 12 | 0.010 | 2.69E-02 |
| FatP32/                | 0.97 | 0.033 | 23 | 0.007 | 1.68E-03 |
| FatmI/                 | 0.77 | 0.042 | 14 | 0.011 | 1.65E-14 |
| FatmIV/                | 1.07 | 0.040 | 12 | 0.012 | 2.61E-05 |
| FatmV/                 | 0.79 | 0.065 | 28 | 0.012 | 3.20E-18 |
| FatmV/FatΔD            | 0.70 | 0.045 | 7  | 0.017 | 2.93E-07 |
| FatΔF/FatmV            | 0.63 | 0.053 | 9  | 0.018 | 1.71E-09 |

| Rescue Constructs       | Normalized width/length ratio | Standard deviation | Number measured | Standard error of the mean | <i>P</i> -value for <i>t</i> -test to Fat <sup>+</sup> |
|-------------------------|-------------------------------|--------------------|-----------------|----------------------------|--------------------------------------------------------|
| Fat <sup>+</sup>        | 1.00                          | 0.009              | 29              | 0.002                      |                                                        |
| FatΔA                   | 0.99                          | 0.008              | 18              | 0.002                      | 1.83E-02                                               |
| FatΔB                   | 1.01                          | 0.007              | 16              | 0.002                      | 2.31E-07                                               |
| FatΔC                   | 1.00                          | 0.012              | 26              | 0.002                      | 9.87E-02                                               |
| FatΔD                   | 1.16                          | 0.016              | 30              | 0.003                      | 2.38E-42                                               |
| FatΔE                   | 1.05                          | 0.013              | 31              | 0.002                      | 1.94E-24                                               |
| FatΔF                   | 1.12                          | 0.025              | 31              | 0.004                      | 5.05E-26                                               |
| FatΔF/FatΔD             | 1.12                          | 0.010              | 12              | 0.003                      | 6.85E-19                                               |
| FatΔD/FatΔD             | 1.12                          | 0.010              | 12              | 0.003                      | 3.21E-15                                               |
| FatΔF/FatΔF             | 1.18                          | 0.021              | 14              | 0.006                      | 1.57E-14                                               |
| Fat <sup>+</sup> /FatΔD | 1.12                          | 0.021              | 16              | 0.005                      | 5.05E-05                                               |
| Fat <sup>+</sup> /FatΔF | 1.02                          | 0.010              | 9               | 0.003                      | 4.89E-09                                               |
| FatΔD/FAT4              | 1.02                          | 0.006              | 10              | 0.002                      | 5.12E-10                                               |
| FatΔF/FAT4              | 1.18                          | 0.016              | 8               | 0.006                      | 1.84E-09                                               |
| Fat <sup>+</sup> /FAT4  | 1.19                          | 0.014              | 7               | 0.005                      | 1.13E-08                                               |
| FatP32/                 | 1.01                          | 0.003              | 12              | 0.001                      | 1.93E-04                                               |
| FatmI/                  | 1.15                          | 0.013              | 16              | 0.003                      | 4.73E-24                                               |
| FatmIV/                 | 0.99                          | 0.007              | 12              | 0.002                      | 1.85E-03                                               |
| FatmV/                  | 1.25                          | 0.024              | 26              | 0.005                      | 4.78E-32                                               |
| FatmV/FatΔD             | 1.19                          | 0.026              | 10              | 0.008                      | 6.76E-10                                               |

The normalized width/length ratio was calculated by measuring the width and length as indicated in the image below, and then normalizing to the average value in wild-type wings.

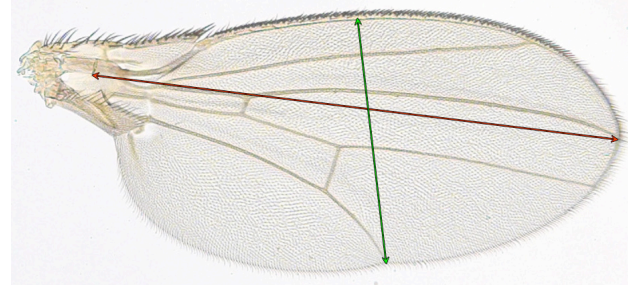



**Table S2. Primers****Primers to generate Fat ICD truncates in pUAST-fat plasmid**

| Construct | PCR template | Primers for 5' fragment |            | Primers for middle fragment |            | Primers for 3' fragment |             |
|-----------|--------------|-------------------------|------------|-----------------------------|------------|-------------------------|-------------|
| ft-STI    | ft:FVH       | ftSPL_NotI5             | ftSPL_SOE3 |                             |            | ftL2_SOE5               | ftFVH_XbaI3 |
| ft-STI-1  | ft-STI       | ftSPL_NotI5             | STI-1-SOE  |                             |            | FVH_SOE5                | ftFVH_XbaI3 |
| ft-STI-2  | ft-STI       | ftSPL_NotI5             | STI-2-SOE  |                             |            | FVH_SOE5                | ftFVH_XbaI3 |
| ft-STI-3  | ft-STI       | ftSPL_NotI5             | STI-3-SOE  |                             |            | FVH_SOE5                | ftFVH_XbaI3 |
| ft-STI-4  | ft:FVH       | ftSPL_NotI5             | STI-4-SOE  |                             |            | TM-SOE                  | ftFVH_XbaI3 |
| ft-STI-5  | ft-STI       | ftSPL_NotI5             | ft-TM3     | STI5-SOE-A                  | STI5-SOE-B | FVH_SOE5                | ftFVH_XbaI3 |
| ft-STI-6  | ft-STI       | ftSPL_NotI5             | ft-TM3     | STI6-SOE-A                  | STI-2-SOE  | FVH_SOE5                | ftFVH_XbaI3 |
| ft-STI-7  | ft-STI       | ftSPL_NotI5             | ft-TM3     | STI7-SOE-A                  | STI-3-SOE  | FVH_SOE5                | ftFVH_XbaI3 |
| ft-STI-8  | ft-STI       | ftSPL_NotI5             | ft-TM3     | STI8-SOE-A                  | STI8-SOE-B | FVH_SOE5                | ftFVH_XbaI3 |
| ft-STI-9  | ft-STI       | ftSPL_NotI5             | ft-TM3     |                             |            | STI9-SOE                | ftFVH_XbaI3 |
| ft-STI-10 | ft-STI       | ftSPL_NotI5             | ft-TM3     | STI5-SOE-A                  | STI-3-SOE  | FVH_SOE5                | ftFVH_XbaI3 |
| ft-STI-11 | ft-STI       | ftSPL_NotI5             | ft-TM3     | STI6-SOE-A                  | STI-3-SOE  | FVH_SOE5                | ftFVH_XbaI3 |
| ft-STI-12 | ft-STI       | ftSPL_NotI5             | ft-TM3     |                             |            | STI5-SOE-A              | ftFVH_XbaI3 |
| ft-STI-13 | ft-STI       | ftSPL_NotI5             | ft-TM3     |                             |            | STI6-SOE-A              | ftFVH_XbaI3 |
| ft-STI-14 | ft-STI       | ftSPL_NotI5             | ft-TM3     |                             |            | STI7-SOE-A              | ftFVH_XbaI3 |
| ft-STI-15 | ft-STI       | ftSPL_NotI5             | ft-TM3     |                             |            | STI8-SOE-A              | ftFVH_XbaI3 |

**Primer sequences**

ftSPL\_NotI5: 5'-TCT GCG GCC GCA TGG AGA GGC TAC TGC TCC-3'

ftSPL\_SOE3: 5'-TGA AGT TGA GAG TGC TTC TTC TTC GCG GAA AGG CGG CAT-3'

ftL2\_SOE5: 5'-CCG CGA AGA AGA AGC ACT CTC AAC TTC AAC AAA CAG CCC CTG-3'

ftFVH\_XbaI3: 5'-GG TCT AGA GAT CA GCG GGT TTA AAC TCA ATG GTG-3'

FVH\_SOE5: 5'-ACC GAC TAC AAG GAC GAC GAC GAC AAG-3'

(Overlapping sequence: 5'-CGT CGT CGT CCT TGT AGT CGG TAC C-3')

STI-1-SOE: 5'- CGT CGT CGT CCT TGT AGT CGG TAC C AAG CGG CGG AAT GGG CAG GTG ATG-3'

STI-2-SOE: 5'- CGT CGT CGT CCT TGT AGT CGG TAC C TTC GCT GTT GCT GTG AAC GTC CTT-3'

STI-3-SOE: 5'- CGT CGT CGT CCT TGT AGT CGG TAC C CTC ACC ACC GCT TAG TGC TCT GGA-3'

STI-4-SOE: 5'-CTT CTT CGC GGA AAG GCG GCA TAT-3'

TM-SOE: 5'-GCC GCC TTT CCG CGA AGA AGA GCC GAT CCT CTC AGC ATT GGC TTC-3'

ft-TM3: 5'-CGA TAG ATA ACA TAG GAG CCC AGT-5'

(Overlapping sequence: 5'-GGG CTC CTA TGT TAT CTA TCG ATT C-3')

STI5-SOE-A: 5'- GGG CTC CTA TGT TAT CTA TCG ATT C CAG CAA CGT CCC CAG CGA CCC GAT-3'

STI6-SOE-A: 5'- GGG CTC CTA TGT TAT CTA TCG ATT C AGT GTT CCA CCT GTT TCC GCC

TAC-3'

STI7-SOE-A: 5'- GGG CTC CTA TGT TAT CTA TCG ATT C CAC AGC AAC AGC GAA CGC AGT CTG-3'

STI8-SOE-A: 5'- GGG CTC CTA TGT TAT CTA TCG ATT C AAC AGT CTC AGT GGC GAC GGC AAG-3'

STI9-SOE: 5'- GGG CTC CTA TGT TAT CTA TCG ATT C AAT GGA GCC GCA TCC CCA TCG GCC-3'

(Overlapping sequence: 5'-CGT CGT CGT CCT TGT AGT CGG TAC C-3')

STI5-SOE-B: 5'- CGT CGT CGT CCT TGT AGT CGG TAC C GGC CTT GTA TTT GCG TAG GCC

AGC-3'

STI8-SOE-B: 5'- CGT CGT CGT CCT TGT AGT CGG TAC C ATT GGC CTT GCG GTA GAT ACC GCT C-3'

**Primers to generate human Fat-ICD and *Drosophila* Fat hybrid genomic constructs:**

1. Forward: galK\_ICD\_F: ATT GTC TTC TTC GTC ATT CTG GTG GTG GCT ATA CTG GGC TCC TAT GTT ATC TAT CGA  
TTC CCT GTT GAC AAT TAA TCA TCG GCA

1. Reverse: galK\_ICD\_R:

TGG GGC TCA GAC TTT AGG AAC ACT TTA ACT TTC GTT GAA GAG CAT ACA CAA CAT ATA TTA TCA GCA CTG  
TCC TGC TCC TT

2. hsft4\_SOE5: GGG CTC CTA TGT TAT CTA TCG ATT C AAC CAG TGC AGG GGG AAG AAG

GCC

2. hsft4\_FLAGXhoI3: AAA CTC GAG TCA ACC CTT GTC GTC GTC GTC CTT GTA GTC CAC ATA

3. TM\_F: CTCAGCATTGGCTTCACCCTGGTC

3. TM\_R: CGATAGATAACATAGGAGCCCAGT

3. FLAGft\_dwn\_F: GAC TAC AAG GAC GAC GAC GAC AAG GGT TGA TA ATA TAT GTT GTG TAT GCT CTT CAA CG

3. FLAG\_R: TCA ACC CTT GTC GTC GTC GTC CTT GTA GTC

Notes: 1. Primers used to insert galK into fly fat ICD region. 2. Primers used to generate fusion protein of human Fat-ICD with *Drosophila* Fat (signal peptide plus transmembrane domain) in pUAST plasmid. 3. Primers used to generate fusion proteins of human Fat-ICD with *Drosophila* Fat (ECD plus transmembrane domain) in genomic rescue construct

**Primers to generate *fat* genomic rescue constructs with deletions:**

A. Fat-Delta aa4704-4711-Fgalk: GAACCCACTGCGGAGATGCCACAGCCGCAGCAGCAGCAACGTCCCCAG  
CCTGTTGACAATTAATCATCGGCA

A. Fat-Delta aa4704-4711-Rgalk: GGATGAAGCGGCGGAATGGGCAGGTGATGATCCTCCCTTATCAGAGGACT  
TCAGCACTGTCCTGCTCCTT

A. Fat ICD F: ATTGTCTTCTTCGTCATTCTGGTGGTGGCTATACTGGGCTCCTATGTTATCTATCGATTC

A. FatDel4704-4711R: GATCCTCCCTTATCAGAGGACTCTGGGGACGTTGCTGCTGCTGC

A. FatDel4704-4711F: GCAGCAACGTCCCCAGAGTCCTCTGATAAGGGAGGATCATC

A. FatDel4921-4959R: GGAAGTTTGCTGCGCCTGCTGCT

B. Fat-Delta aa4745-4770-Fgalk:CTCTCCCCTGGAGCACGCCAGTTCCGTGGACATGGGTTCCGAGTACCCG  
CCTGTTGACAATTAATCATCGGCA

B. Fat-Delta aa4745-4770-Rgalk:

GCGGAAACAGGTGGAACACTGGCCTTGTATTTGCGTAGGCCAGCAGCCTC TCAGCACTGTCCTGCTCCTT

B. Fat ICD F FatDel4745-4770R: TGCGTAGGCCAGCAGCCTCCGGGTACTCGGAACCCATGTCC

B. FatDel4745-4770F: GACATGGGTTCCGAGTACCCGAGGCTGCTGGCCTACGCAAATA

B. FatDel4921-4959R: GGAAGTTTGCTGCGCCTGCTGCT

C. Fat-Delta aa4921-4959-Fgalk:CCAGCAGGCAAAAGCCCGGAGTGCCACAGCAGCAGGCGCAGCAAACCTTCC  
CCTGTTGACAATTAATCATCGGCA

C. Fat-Delta aa4921-4959-Rgalk:GAAGTCGAACTATGGGCATCCACATCTCCACCCAGCGACATATGCAGAGC  
TCAGCACTGTCCTGCTCCTT

C. ftSTm\_checkF:GCCAGTTCCGTGGACATGGGTTCC

C. FatDel4921-4959R: GGAAGTTTGCTGCGCCTGCTGCT

C. FatDel4921-4959F: TGCCACAGCAGCAGGCGCAGCAAACCTCCGCTCTGCATATGTCGCTGGGTGGA

C. ftSTm\_checkR: cggaatggcggtgtcttgaccac

D. Fat-Delta aa4975-4993-Fgalk: GCAGCGCTCTGCATATGTCGCTGGGTGGAGATGTGGATGCCCATAGTTCCG  
CCTGTTGACAATTAATCATCGGCA

D. Fat-Delta aa4975-4993-Rgalk: GAGGAGACTCTTGCTGGTGAATACTTGCCGTCGCCACTGAGACTGTTATT  
TCAGCACTGTCCTGCTCCTT

D. ftSTm\_checkF: FatDel4975-4993R: GCCGTCGCCACTGAGACTGTTATTCGAACATATGGGCATCCACATCTCCA

D. FatDel4975-4993F: GAGATGTGGATGCCCATAGTTTCGAATAACAGTCTCAGTGGCGACGGCA

D. ftSTm\_checkR

E. Fat-Delta aa5089-5114-Fgalk: TCTACCGCAAGGCCAATGGAGCCGCATCCCCATCGGCCACCACCCTCGGC  
CCTGTTGACAATTAATCATCGGCA

E. Fat-Delta aa5089-5114-Rgalk: GTGGACACCACTTGGGTTTGCTGCTGCTGTTGCTGCGACGGTCCATTTGT  
TCAGCACTGTCCTGCTCCTT

E. Fat-DeltaCDEseq-F: GCAAGGACGTTACAGCAACAGCG

E. FatDel5089-5114R: GTTGCTGCGACGGTCCATTTGTGCCGAGGGTGGTGGCCGATGGGGA

E. FatDel5089-5114F: CATCGGCCACCACCCTCGGCACAAATGGACCGTCGCAGCAACA

E. FLAG\_R: TCAACCCTTGTCGTCGTCGTCCTTGTAGTC

F. Fat\_Cterm\_galkF: GTG GTG TCC ACG CTA CGA ATG CCA TCA TCG AAT GGA CCG GCG GCT CCA GAG GAG TAC  
GTG CCT GTT GAC AAT TAA TCA TCG GCA

F. Fat\_Cterm\_galkR: TGG GGC TCA GAC TTT AGG AAC ACT TTA ACT TTC GTT GAA GAG CAT ACA CAA CAT ATA  
TTA TCA GCA CTG TCC TGC TCC TT

F. Fat-HomoDomainF-F: GACTACAAGGACGACGACGACAAGGGTTGA

F. Fat\_C\_chkR: TCCGACATATGCACGATTCTACAC

EGF. Fat-EGF1flank-Fgalk:GAGAGAAGCGTTCAGCGTTTTTCGGAACCTCCTGCAAAAGGAGGTGATTGTG  
CCTGTTGACAATTAATCATCGGCA

EGF. Fat-EGF4flank-Rgalk:GAGCGGGAAAAGTCATGTAGGACAGCGGTTGGAATCCATAGCTAAAACG  
TCAGCACTGTCCTGCTCCTT

EGF. Fat33759seq\_F: AGAATCCCGCCCAGAGTCAA

EGF. FatDeIEGF1-4R: GGAATCCATAGCTAAAACGCACAATCACCTCCTTTTGCA

EGF. FatDeIEGF1-4F: GCAAAAGGAGGTGATTGTG CGTTTTAGCTATGGATTCCAA

EGF. Fat34583seq\_R: GGTCCCACTTCGTCCGCATA

Notes: Deletions were created by first replacing the relevant region with *galK*. The forward fragment and reverse fragments were then hybridized and extended to generate a DNA fragment without the relevant region but both 5' and 3' homolog arms for recombineering. Primers listed were: (A) for deletion of region A (RPDIHERE, aa4704-4711, cgacccgatcatagagcgcgag), creating plasmid *attB-P[acman]-V5ftΔA-Flag*; (B) for deletion of region B (EHYDLENASSIAPSDIDIVYHYKGYR, aa4745-4770, gaacactacgacctcgagaacgccagctccattgctcctccgacattgatatagctatcattacaaggctatcgt), creating plasmid *attB-P[acman]-V5ftΔB-Flag*; (C) for deletion of region C (MGLTAEIEIRLNGRPTCSLISTLDAVSSSSEAPRVSS, aa4921-4959, atgggcttgaccgccgaggagattgagagattgaatggcagaccacgaactgtagcctaattccaccctggatgccgtctcctccagcagtgaggcgcctcgagtgcgagcagc), creating plasmid *attB-P[acman]-V5ftΔC-Flag*; (D) for deletion of region D (TSTDESGNDSFTCSEIEYD, aa4975-4993, actccacggacgaaagcggcaacgacagcttcacgtgctcggagatcgagtacgac), creating plasmid *attB-P[acman]-V5ftΔD-Flag*; (E) for deletion of region E (WEYLLNWGPSYENLMGVFKDIAELPD, aa5089-5114, tgggagtattctgctcaattggggacctagctacgaaaatctgatggcgcttcaaggacattgccgagctccggac), creating plasmid *attB-P[acman]-V5ftΔE-Flag*; (F) For deletion of region F (EEYV, aa5144-5147, gaggagtacgtg), creating plasmid *attB-P[acman]-V5ftΔF-Flag*; (EGF) for deletion of region EGF

(GYEPCSEPDVCENGGVCSATMRLLDHHSFVIQDSPALVLSGPRVVHDYSCQCTSGFSGEQCSRQDPCLPNPCHSQQVQCRR  
LGSDFQCMCPANRDGKHCEKERSDVCYSKPCRNGGSCQRSPDGSSYFCLCRPGFRGNQCESVSDSCRPNPCLHGGGLCVSLKP  
GYKCNCTPGRYGRHCE, aa3950-4128,  
ggctatgaaccctgcagtgaaaccggatgtttgtgaaaatggcggagctgcagtgccaccatgcgactgctggatgccatagctttgtatccaagacagtcggccttggtgctgagtgctcctcg  
ggttgtgcacgactacagctgccagtgaccagtgattctcggcgagcagtgagctgctggcaggatccttgctgcccaatccttgccattcgagtgccaatgccgtcgcctggtagcgat  
ttccagtgcatgtgctcctccaatcgggatggcaagcactgcgagaaggaacgcagtgacgtgtgctatagcaagccgtgctgcaatggaggaagttccaacgcagtcggacggatcctccta

ctttgcctatgctgcccggattccgtggcaatcagtcgagagcgtgctggactcatgccaccaatccctgtctgcacgggtgctgtgtagctcaagccaggatacaaatgcaactgac  
gccgggacgatatggacgacattgcgag), creating plasmid *attB-P[acman]-V5ftΔEGF-Flag*.

**Primers to generate *fat* genomic rescue constructs with deletions:**

fatmutrecgalKI-F: AAGGTGGCCAACCGCCACCGCCGCCACCAGTGCATCCCCGCACCCATCAG  
CCTGTTGACAATTAATCATCGGCA

fatmutrecgalKVI-R:

CCATTGGCCTTGCGGTAGATACCGCTCAGGTGATTGGCTATATCATCGTC TCAGCACTGTCCTGCTCCTT

I-F: GCA TCC CGC ACC CAT CAG GCC ACT CCA CTG GCC CGA CTC

IV-F: GGC AGA CCA CGA ACT TGT GCC CTA ATC GCC ACC CTG GAT GCC GTC GCC

IV-R: GAG GCG CCT CGA GTG GCG GCC GCC GCT CTG CAT ATG GCG CTG GGT GGA GAT GTG

V1-F: GCT GCC GCG GAC GAA GCC GGC AAC GAC AGC TTC

V1-R: GAG TAC GAC AAT AAC GCT CTC GCT GGC GAC GGC AAG TAT

V-R: GAA GCC GGC AAC GAC GCC TTC ACG TGC GCG GAG ATC GAG TAC GAC

fatmutrecI-F: AAGGTGGCCAACCGCCACCGCCGCCACCAGTGCATCCCCGCACCCATCAG

fatmutrecVI-R: CCATTGGCCTTGCGGTAGATACCGCTCAGGTGATTGGCTATATCATCGTC

Notes: First, the sequence between Fat-mI and Fat-mV was replaced by *galK* using fatmutrecgalKI-F and fatmutrecgalKVI-R to generate plasmid *attB-P[acman]-V5ft-mut-galK-Flag*. Then, nucleotide substitutions were introduced into pUAST-fat-STI plasmid, using I, IV, or V primers to generate pUAST-fat-mutI, pUAST-fat-mutIV and pUAST-fat-mutV. The mutated fragments were PCR amplified from pUAST-fat-mutI, pUAST-fat-mutIV and pUAST-fat-mutV and introduced into *attB-P[acman]-V5ft-mut-galK-Flag* to generate plasmids *attB-P[acman]-V5ft-mutI-Flag*, *attB-P[acman]-V5ft-mutIV-Flag*, *attB-P[acman]-V5ft-mutV-Flag*.

**Primers to introduce the ΔD and mV mutations into pUAST\_ft\_STI4FVH construct:**

Fat-STI:4- ΔD:FLAG (pUAS\_ft\_STI4\_ ΔD\_FVH)

Fat-STI:4- mutV:FLAG (pUAS\_ft\_STI4\_mutV\_FVH)

STI4FVH\_deleteD\_F: GATGTGGATGCCCATAGTTTCGAATAACAGTCTCAGTGGCGAC

STI4FVH\_deleteD\_R: GTCGCCACTGAGACTGTTATTCGAACTATGGGCATCCACATC

Notes: The  $\Delta D$  or mV mutation was amplified by PCR from corresponding genomic constructs. Then these PCR fragments were introduced into the pUAST\_ft\_STI4FVH plasmid.

**Table S3. Abbreviations for Fat transgenes**

| <u>Abbreviated name</u> | <u>Full name</u>                 |
|-------------------------|----------------------------------|
| <i>Fat<sup>+</sup></i>  | <i>P[acman]V5:fat[68A4]</i>      |
| <i>FatΔA</i>            | <i>P[acman]V5:fatΔA[68A4]</i>    |
| <i>FatΔB</i>            | <i>P[acman]V5:fatΔB[68A4]</i>    |
| <i>FatΔC</i>            | <i>P[acman]V5:fatΔC[68A4]</i>    |
| <i>FatΔD</i>            | <i>P[acman]V5:fatΔD[68A4]</i>    |
| <i>FatΔE</i>            | <i>P[acman]V5:fatΔE[68A4]</i>    |
| <i>FatΔF</i>            | <i>P[acman]V5:fatΔF[68A4]</i>    |
| <i>FatΔP32</i>          | <i>P[acman]V5:fat-P32[68A4]</i>  |
| <i>FatΔmI</i>           | <i>P[acman]V5:fat-mI[68A4]</i>   |
| <i>FatΔmIV</i>          | <i>P[acman]V5:fat-mIV[68A4]</i>  |
| <i>FatΔmV</i>           | <i>P[acman]V5:fat-mV[68A4]</i>   |
| <i>Fat:Fat4</i>         | <i>P[acman]V5:fat:FAT4[68A4]</i> |
| <i>FatΔEGF</i>          | <i>P[acman]V5:fatΔEGF[68A4]</i>  |
